# Supplementary material
Source: MDPI journal article supplement (https://www.mdpi.com/2226-471X/9/1/9)

**Table S1. The target binomial phrases selected in the study**

| <b>Items (in their preferred word order)</b> | <b>Type</b> |
|----------------------------------------------|-------------|
| sunrise and sunset                           | Arabic      |
| coffee and dates                             | Arabic      |
| land and sea                                 | Arabic      |
| rice and meat                                | Arabic      |
| prophets and messengers                      | Arabic      |
| sun and moon                                 | Arabic      |
| heaven and hell                              | Arabic      |
| hunger and thirst                            | Arabic      |
| fig and olives                               | Arabic      |
| poetry and prose                             | Arabic      |
| seller and buyer                             | Arabic      |
| camels and sheep                             | Arabic      |
| individual and society                       | Arabic      |
| Jews and Christians                          | Arabic      |
| boys and girls                               | Congruent   |
| brothers and sisters                         | Congruent   |
| Adam and Eve                                 | Congruent   |
| success and failure                          | Congruent   |
| food and drink                               | Congruent   |
| king and queen                               | Congruent   |
| profit and loss                              | Congruent   |
| men and women                                | Congruent   |
| north and south                              | Congruent   |
| past and present                             | Congruent   |
| rich and poor                                | Congruent   |
| gold and silver                              | Congruent   |
| strengths and weaknesses                     | Congruent   |
| reading and writing                          | Congruent   |
| bride and groom                              | English     |
| cause and effect                             | English     |
| fish and chips                               | English     |
| church and state                             | English     |
| costs and benefits                           | English     |
| art and design                               | English     |
| accident and emergency                       | English     |
| facts and figures                            | English     |
| knife and fork                               | English     |
| law and order                                | English     |
| rules and regulations                        | English     |
| salt and pepper                              | English     |
| pain and suffering                           | English     |
| trial and error                              | English     |
| mind and body                                | Control     |
| town and country                             | Control     |
| hands and knees                              | Control     |
| head and shoulders                           | Control     |

|                        |         |
|------------------------|---------|
| income and expenditure | Control |
| indoor and outdoor     | Control |
| time and money         | Control |
| science and education  | Control |
| age and sex            | Control |
| sweet and sour         | Control |
| iron and steel         | Control |
| stocks and shares      | Control |
| urban and regional     | Control |
| words and phrases      | Control |

**Table S2. Average correct responses in the norming studies across the item types for NSs and NNSs**

| Item category | Judgement task     |                     | Forward completion |                     | Backward completion |                     |
|---------------|--------------------|---------------------|--------------------|---------------------|---------------------|---------------------|
|               | NS ( <i>n</i> =13) | NNS ( <i>n</i> =40) | NS ( <i>n</i> =10) | NNS ( <i>n</i> =32) | NS ( <i>n</i> =10)  | NNS ( <i>n</i> =11) |
| Congruent     | 90.47%             | 68.93%              | 94.16%             | 44.2%               | 73.57%              | 27.14%              |
| English-only  | 100%               | 51.07%              | 61.69%             | 13.84%              | 52.85%              | 5.71%               |
| Arabic-only   | 66.68%             | 60.90%              | 48.05%             | 21.88%              | 35.00%              | 7.14%               |

**Table S3. Example for the item *gold and silver* when presented two and five times in the reading passages**

| <b>List</b> | <b>Item</b>     | <b>Passage</b>                                                                                                                                                                                                                                                                                                                                                                                                                                                                                                                                                                                        |
|-------------|-----------------|-------------------------------------------------------------------------------------------------------------------------------------------------------------------------------------------------------------------------------------------------------------------------------------------------------------------------------------------------------------------------------------------------------------------------------------------------------------------------------------------------------------------------------------------------------------------------------------------------------|
| 1           | gold and silver | The first time in history currency was exchanged was in the form of gold and silver in 1500 BC. In 1066, the Norman conquerors issued gold and silver coins to use in international trade. In 1285, Venice and England recognized gold and silver as official currency. In 1792, the United States started adapting a gold and silver monetary system that was linked to the value of the dollar. However, converting the dollar into assets such as gold and silver was suspended by President Nixon in 1971.                                                                                        |
| 1           | fish and chips  | Winston Churchill once described fish and chips as 'the good companions'. England's popular dish of fish and chips first appeared in UK shops in 1860 and was sold by a Jewish immigrant.                                                                                                                                                                                                                                                                                                                                                                                                             |
| 2           | gold and silver | In 1792, the United States started adapting a gold and silver monetary system that was linked to the value of the dollar. However, converting the dollar into assets such as gold and silver was suspended by President Nixon in 1971.                                                                                                                                                                                                                                                                                                                                                                |
| 2           | fish and chips  | Winston Churchill once described fish and chips as 'the good companions'. England's popular dish of fish and chips first appeared in UK shops in 1860 and was sold by a Jewish immigrant. By the 19th century, the presence of fish and chips shops had increased significantly to meet the demands of a growing industrial population. It started as a popular take-away meal among the British working class, and then later fish and chips became popular among all social classes. Nowadays, the popularity of fish and chips has reached many other English-speaking countries around the world. |

**Table S4. Results of model comparisons**

| <b>A. Likelihood ratio tests for accuracy</b> |                                        |          |
|-----------------------------------------------|----------------------------------------|----------|
|                                               | <b>Accuracy for experimental items</b> |          |
| <i>Predictors</i>                             | $\chi^2$                               | <i>p</i> |
| Group                                         | 45.48                                  | <0.001   |
| Item Type                                     | 14.62                                  | <0.001   |
| Session                                       | 53.79                                  | <0.001   |
| Familiarity ratings for non-natives           | 1.38                                   | 0.239    |
| Familiarity ratings for natives               | 7.77                                   | 0.005    |
| Length                                        | 2.17                                   | 0.139    |
| Forward/backward ratio                        | 1.54                                   | 0.213    |

  

| <b>B. Likelihood ratio tests for response time (word order recognition task)</b> |                                  |          |
|----------------------------------------------------------------------------------|----------------------------------|----------|
|                                                                                  | <b>RT for experimental items</b> |          |
| <i>Predictors</i>                                                                | $\chi^2$                         | <i>p</i> |
| Group                                                                            | 37.70                            | <0.001   |
| Item Type                                                                        | 11.59                            | 0.003    |
| Session                                                                          | 1013.44                          | <0.001   |
| Familiarity ratings for non-natives                                              | 3.08                             | 0.079    |
| Familiarity ratings for natives                                                  | 0.01                             | 0.930    |
| Length                                                                           | 17.98                            | <0.001   |
| Forward/backward ratio                                                           | 0.80                             | 0.368    |

---

**C. Likelihood ratio tests for reading times data (self-paced reading task)**

---

| <i>Predictors</i>                   | <b>RT</b> |          |
|-------------------------------------|-----------|----------|
|                                     | $\chi^2$  | <i>p</i> |
| Group                               | 89.85     | <0.001   |
| Item Type                           | 0.35      | 0.841    |
| Reps                                | 1325.32   | <0.001   |
| Familiarity ratings for non-natives | 1.34      | 0.247    |
| Familiarity ratings for natives     | 0.60      | 0.439    |
| Length                              | 46.79     | <0.001   |
| Forward/backward ratio              | 2.49      | 0.115    |
| Trial number                        | 261.52    | <0.001   |
| Pre-test scores                     | 3.39      | 0.066    |
| Word Frequency                      | 0.71      | 0.400    |

---

**Table S5. Analysis of accuracy as a function of repetition****A. Means and standard deviations of accuracy scores by repetition**

| Group | Repetition | Item Type |           |           |           |          |           |
|-------|------------|-----------|-----------|-----------|-----------|----------|-----------|
|       |            | Arabic    |           | Congruent |           | English  |           |
|       |            | <i>M</i>  | <i>SD</i> | <i>M</i>  | <i>SD</i> | <i>M</i> | <i>SD</i> |
| NNS   | 2          | 9.81      | 1.94      | 11.1      | 2.27      | 9.55     | 2.95      |
| NNS   | 5          | 10.10     | 2.28      | 11.00     | 2.25      | 9.87     | 2.07      |
| NS    | 2          | 9.83      | 1.98      | 13.20     | 1.20      | 13.60    | 0.68      |
| NS    | 5          | 10.30     | 2.09      | 13.10     | 1.12      | 13.50    | 0.76      |

*Note.* The maximum score was 14.

**B. Model outcome of accuracy scores as a function of repetition**

| <i>Predictors</i>                              | Accuracy         |                   |                  |          |
|------------------------------------------------|------------------|-------------------|------------------|----------|
|                                                | <i>Estimates</i> | <i>std. Error</i> | <i>Statistic</i> | <i>p</i> |
| (Intercept)                                    | -3.59            | 2.24              | -1.60            | 0.110    |
| Group [NS]                                     | 0.04             | 0.17              | 0.22             | 0.822    |
| Item Type [Congruent]                          | -0.09            | 0.25              | -0.35            | 0.726    |
| Item Type [English]                            | -0.39            | 0.27              | -1.44            | 0.150    |
| Session [Delayed test]                         | -0.38            | 0.11              | -3.43            | 0.001    |
| Reps [5]                                       | 0.08             | 0.07              | 1.14             | 0.256    |
| Familiarity ratings for NNS                    | 0.81             | 0.56              | 1.45             | 0.147    |
| Familiarity ratings for NS                     | 0.37             | 0.13              | 2.91             | 0.004    |
| Group [NS] * Item Type [Congruent]             | 1.35             | 0.23              | 5.90             | <0.001   |
| Group [NS] * Item Type [English]               | 2.61             | 0.28              | 9.21             | <0.001   |
| Item Type [Congruent] * Session [Delayed test] | 0.40             | 0.17              | 2.32             | 0.020    |
| Item Type [English] * Session [Delayed test]   | 0.29             | 0.16              | 1.78             | 0.076    |
| <b>Random Effects</b>                          |                  |                   |                  |          |
| $\sigma^2$                                     | 3.29             |                   |                  |          |

|                                    |               |
|------------------------------------|---------------|
| $\tau_{00}$ subject                | 0.18          |
| $\tau_{00}$ Item                   | 0.26          |
| ICC                                | 0.12          |
| N subject                          | 65            |
| N Item                             | 42            |
| <hr/>                              |               |
| Observations                       | 5459          |
| Marginal $R^2$ / Conditional $R^2$ | 0.180 / 0.278 |

**Table S6. Analysis of response time as a function of test session for experimental and control items**

| <i>Predictors</i>                                 | <b>Log RT</b>    |                   |                  |          |
|---------------------------------------------------|------------------|-------------------|------------------|----------|
|                                                   | <i>Estimates</i> | <i>std. Error</i> | <i>Statistic</i> | <i>p</i> |
| (Intercept)                                       | 7.23             | 0.15              | 48.74            | <0.001   |
| Group [NS]                                        | -0.74            | 0.06              | -12.86           | <0.001   |
| Item Type [Arabic]                                | 0.04             | 0.04              | 1.01             | 0.310    |
| Item Type [Congruent]                             | -0.18            | 0.03              | -5.12            | <0.001   |
| Item Type [English]                               | -0.09            | 0.04              | -2.70            | 0.007    |
| Session [Post-test]                               | -0.20            | 0.02              | -10.33           | <0.001   |
| Session [Delayed test]                            | -0.35            | 0.02              | -18.13           | <0.001   |
| Length (log)                                      | 0.35             | 0.05              | 6.49             | <0.001   |
| Item Type [Arabic] *<br>Session [Post-test]       | -0.13            | 0.03              | -4.64            | <0.001   |
| Item Type [Congruent] *<br>Session [Post-test]    | -0.07            | 0.03              | -2.76            | 0.006    |
| Item Type [English] *<br>Session [Post-test]      | -0.06            | 0.03              | -2.27            | 0.023    |
| Item Type [Arabic] *<br>Session [Delayed test]    | -0.01            | 0.03              | -0.40            | 0.689    |
| Item Type [Congruent] *<br>Session [Delayed test] | 0.01             | 0.03              | 0.34             | 0.733    |
| Item Type [English] *<br>Session [Delayed test]   | 0.03             | 0.03              | 0.97             | 0.334    |
| <b>Random Effects</b>                             |                  |                   |                  |          |
| $\sigma^2$                                        | 0.11             |                   |                  |          |
| $\tau_{00}$ subject                               | 0.04             |                   |                  |          |
| $\tau_{00}$ Item                                  | 0.01             |                   |                  |          |
| ICC                                               | 0.30             |                   |                  |          |

**Figure S1. Interaction between Group and Session**

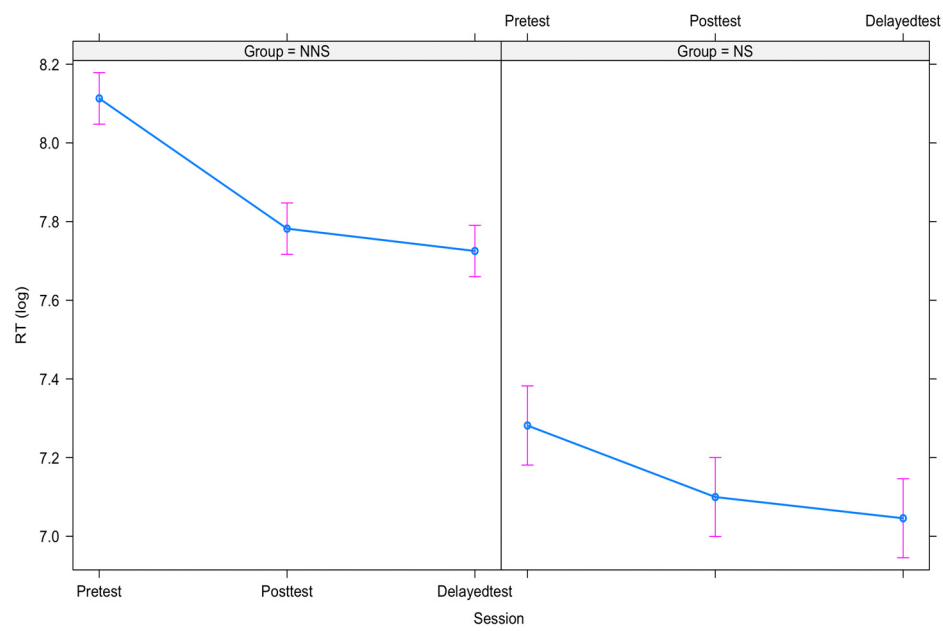

**Figure S2. Interaction between Group and Item Type**

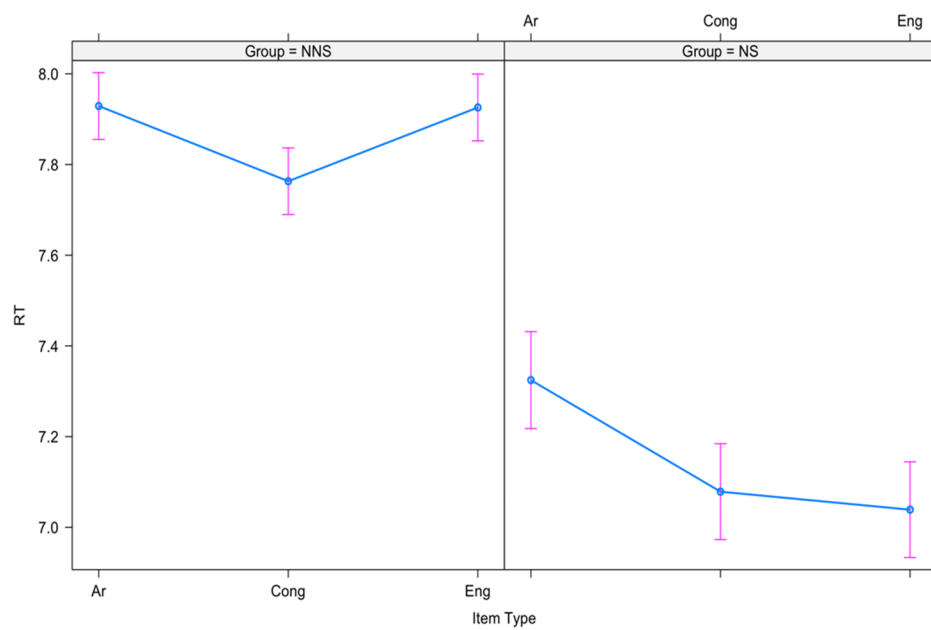

**Table S7. Analysis of response time as a function of repetition**

| <i>Predictors</i>                         | <b>Log RT</b>    |                   |                  |          |
|-------------------------------------------|------------------|-------------------|------------------|----------|
|                                           | <i>Estimates</i> | <i>std. Error</i> | <i>Statistic</i> | <i>p</i> |
| (Intercept)                               | 6.89             | 0.17              | 40.68            | <0.001   |
| Group [NS]                                | -0.56            | 0.07              | -8.47            | <0.001   |
| Session<br>[Delayed test]                 | -0.05            | 0.01              | -4.50            | <0.001   |
| Item Type [Congruent]                     | -0.16            | 0.03              | -4.92            | <0.001   |
| Item Type [English]                       | 0.01             | 0.03              | 0.17             | 0.866    |
| Length [log]                              | 0.36             | 0.06              | 5.78             | <0.001   |
| Reps [5]                                  | -0.01            | 0.01              | -1.35            | 0.179    |
| Group [NS] *<br>Session<br>[Delayed test] | -0.00            | 0.02              | -0.04            | 0.964    |
| Group [NS] * Item Type<br>[Congruent]     | -0.07            | 0.03              | -2.65            | 0.008    |
| Group [NS] * Item Type<br>[English]       | -0.28            | 0.03              | -10.24           | <0.001   |
| <b>Random Effects</b>                     |                  |                   |                  |          |
| $\sigma^2$                                | 0.10             |                   |                  |          |
| $\tau_{00}$ subject                       | 0.05             |                   |                  |          |
| $\tau_{00}$ Item                          | 0.01             |                   |                  |          |
| ICC                                       | 0.36             |                   |                  |          |

**Figure S3. Interaction between Group and Item Type in the reading task**

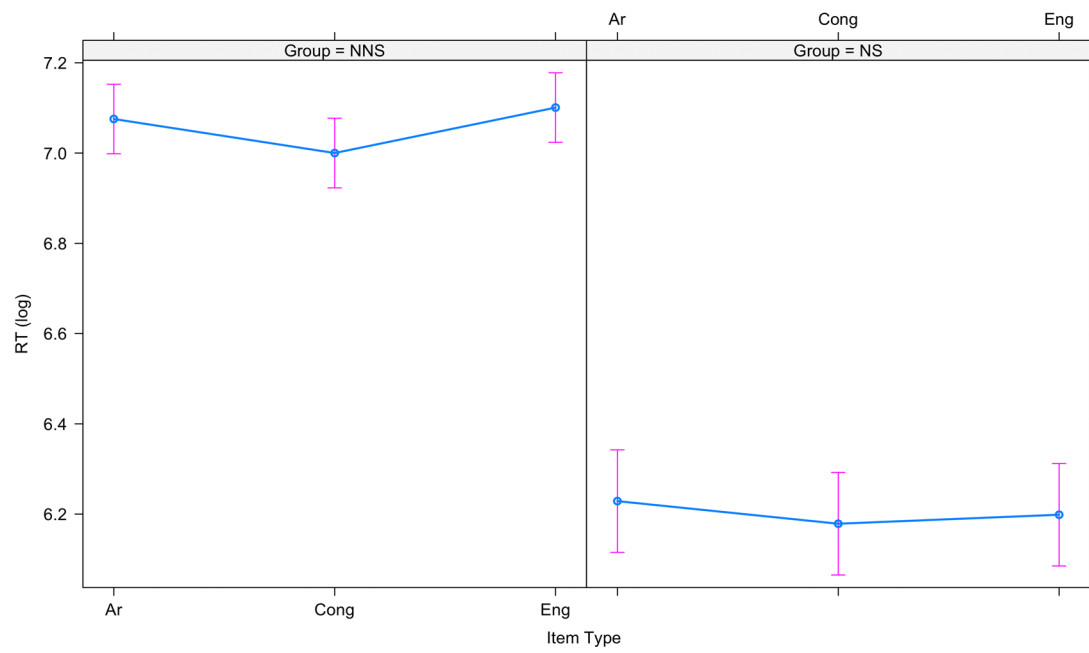

**Figure S4. Interaction between Group and number of repetitions in the reading task**

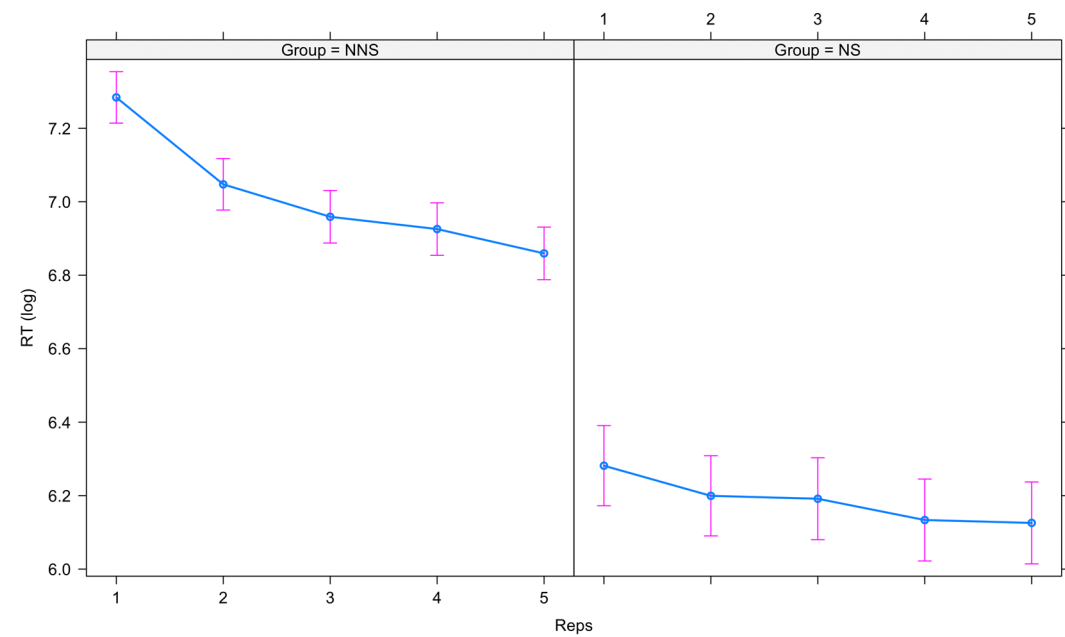

Supplement: s1 [file s1 › languages-2564066-supplementary.pdf]
